# Supplementary material for: Recombinant R-spondin2 and Wnt3a Up- and Down-Regulate Novel Target Genes in C57MG Mouse Mammary Epithelial Cells
Source: PLoS One. 2012 Jan 4;7(1):e29455. doi: 10.1371/journal.pone.0029455 (PMC3251591; doi:10.1371/journal.pone.0029455)
Supplement: Table S4 — siRNA regulation of gene expression in C57MG cells treated with Rspo2 and Wnt3a or BSA alone. (XLS) [file pone.0029455.s004.xls]

## Sheet: Sheet1
Table S4: siRNA regulation of gene expression in C57MG cells treated with Rspo2 and Wnt3a or BSA alone
	siLuc		siCtnnb1		siCtnnb1
	R/W		R/W		BSA
	Fold change*	SD	Fold change*	SD	Fold change*	SD
Axin2	71.22	6.3727	2.53	0.1028	1.42	0.1727
RhoU	66.85	4.1547	1.03	0.324	0.68	0.0515
IL33	25.15	2.0119	2.22	0.2009	3.76	0.8997
CXCR6	20.32	3.9531	0.74	0.1355	0.85	0.0998
Ahr	31.14	2.5047	2.59	0.6041	0.92	0.1367
Klf5	11.7	1.0249	0.94	0.3842	0.85	0.0689
Tec	13.82	2.0047	1.39	0.8534	0.91	0.2093
CCL5	0.35	0.0524	0.29	0.0837	1.1	0.1931
Angpt1	0.02	0.0012	0.51	0.041	0.58	0.0291
CCL7	0.02	0.0361	0.109	0.0215	1.67	0.3215
Smoc1	0.15	0.0042	0.66	0.0373	0.802	0.1127
Saa3	0.0059	0.0085	0.02	0.0017	0.824	0.0145
C3	0.03	0.0104	0.31	0.0247	1.19	0.0051
Hp	0.0052	0.0081	0.056	0.0255	0.57	0.0151
Lcn2	0.0082	0.0307	0.053	0.0112	0.78	0.1004
*Fold change relative to level in cells treated with siLuc and BSA; qRT-PCR analysis
